# Supplementary material
Source: publisher figshare collection journal article supplement (https://karger.figshare.com/ndownloader/files/21531138)
Supplement: Supplementary file 1 [file 21531138]

**Table 2. Charcoal cartridge characteristics**

| **Cartridge characteristics** | **ADSORBA 300** |
| --- | --- |
| **Sorbent material**  **Quantity**  **Total area** | Charcoal  300g  300.000 m^2 |
| **Coating material**  **Membrane thickness** | Cellulose  3-5 mcm |
| **Resistance to Qb of 200 ml/min**  **Priming volume** | 20-30 mmHg  260 ml |
| **Disposable set: internal volume** | 107 ml |
| **Total extracorporeal volume** | 367 ml |
| **Pore size** | 450 mcm |
| **Cartridge material**  **Cartridge filling** | Polypropylene  Polypropylene granules |
| **Length**  **Maximum diameter**  **Weight** | 245 mm  87 mm  0,9 kg |

**Qb**: blood Flow
